# Supplementary material
Source: Springer Nature journal article supplement (https://www.springermedizin.de/resource/supplementary/12889_2011_3311_MOESM2_ESM.pdf/9488784)

# Males

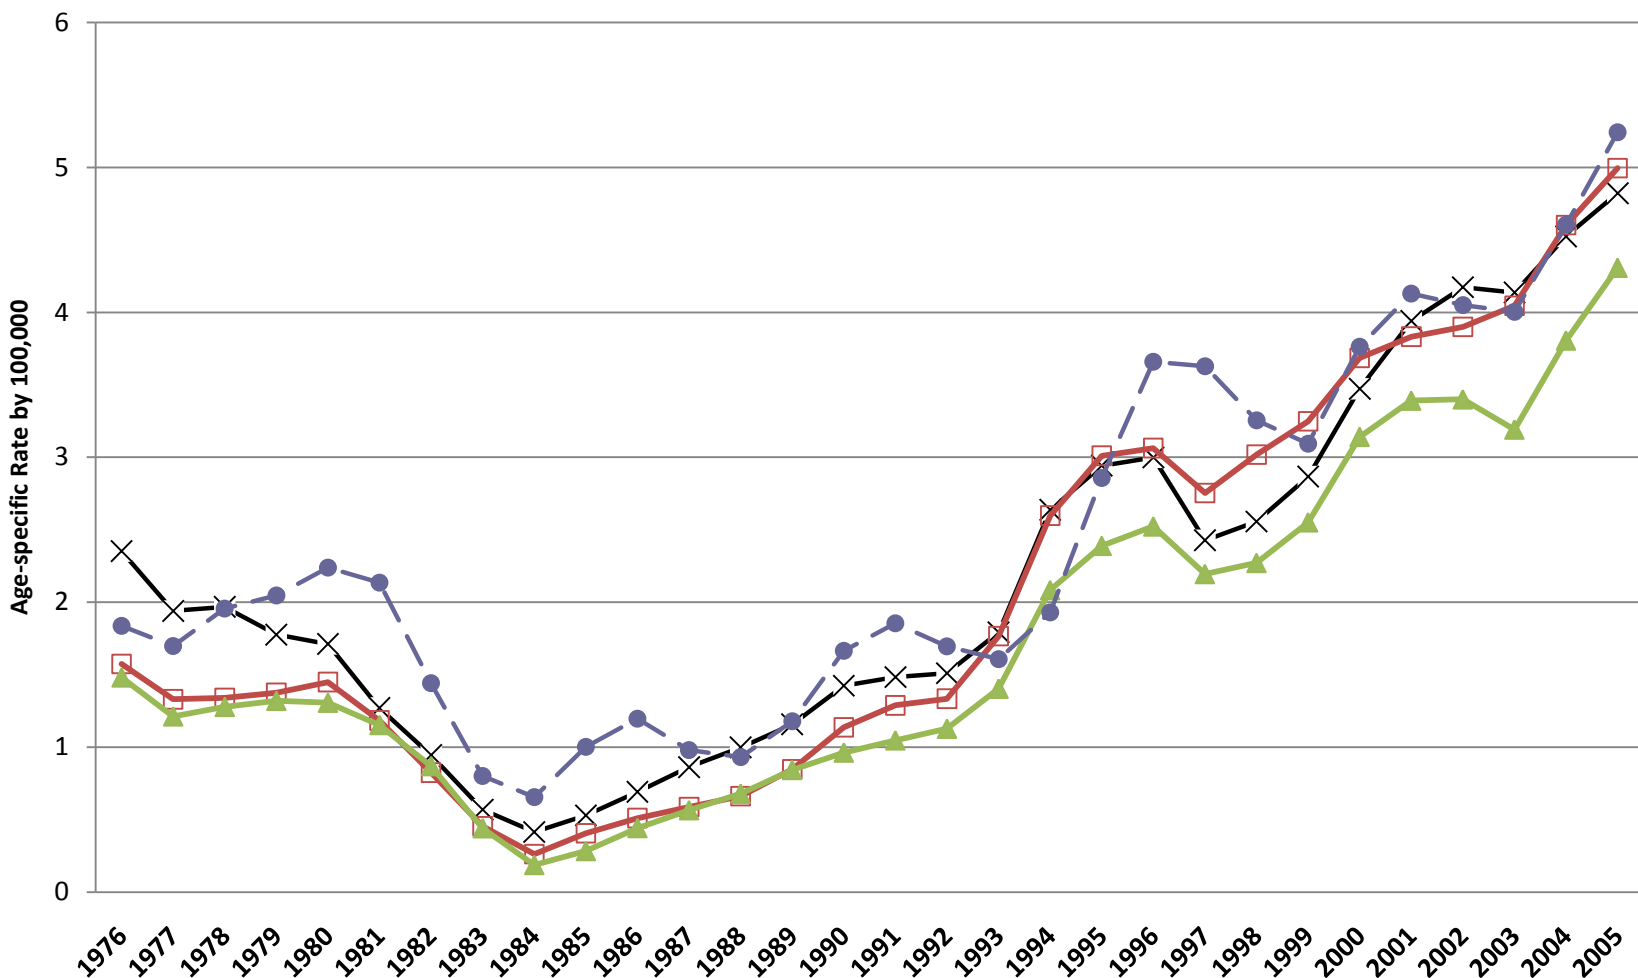

# Females

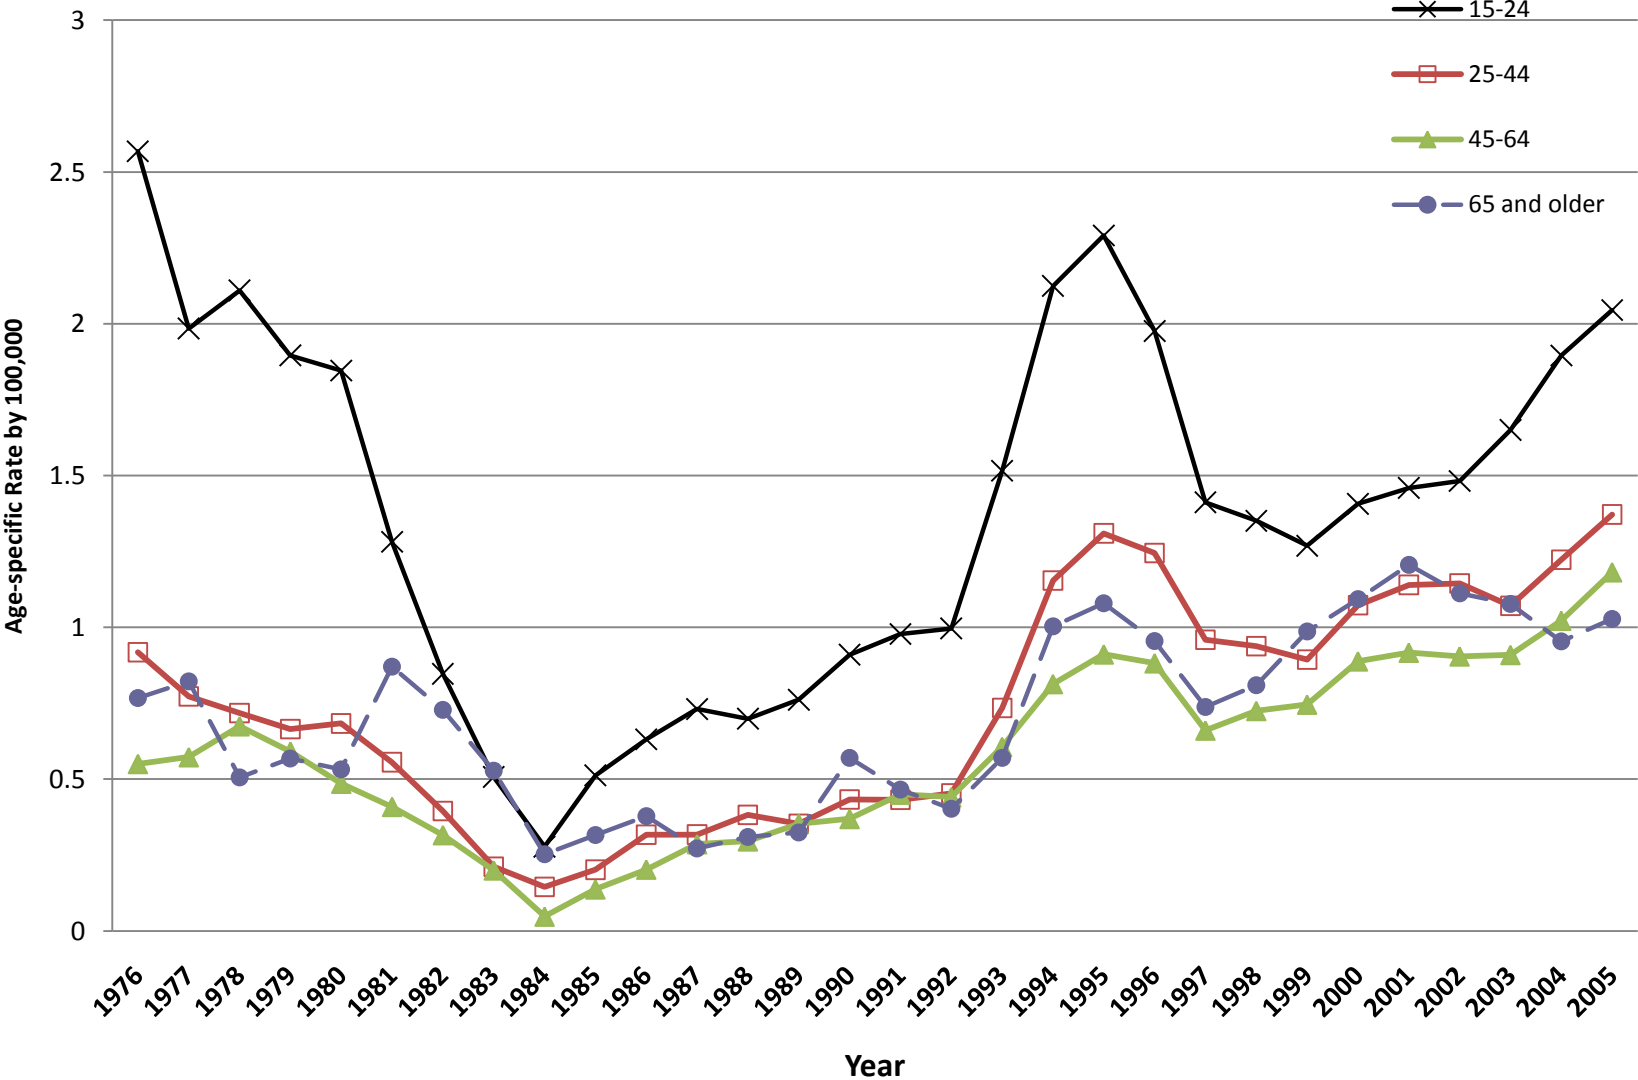

Supplement: MOESM2 [file 9488784]
